# Supplementary material for: Immunoinformatics analysis and antibody epitope comparison of Newcastle disease virus classical vaccines with a virus involved in the fifth NDV panzootic
Source: Research Square preprint supplement (doi:10.21203/rs.3.rs-456948/v1), 2021-04-26
Supplement: Supplementary file 2 [file f1a2a95e0d4be9f1eb169bb3.docx]

Table 7. The total number of analogous epitopes of F and HN proteins between the VII.2 NDV and the vaccine strains for each epitope identity percentage range.

| **Identities** | **Vaccine strains** | | | | | | | | | | | | | | | | | |
| --- | --- | --- | --- | --- | --- | --- | --- | --- | --- | --- | --- | --- | --- | --- | --- | --- | --- | --- |
| **B1** | | **F** | | **I-2** | | **LaSota** | | **PHY.LMV.42** | | **R2B** | | **Ulster** | | **V4** | | **VG/GA** | |
| F | HN | F | HN | F | HN | F | HN | F | HN | F | HN | F | HN | F | HN | F | HN |
| 100% | 3 | 2 | 7 | 2 | 7 | 4 | 4 | 3 | 3 | 3 | 7 | 3 | 5 | 5 | 10 | 4 | 6 | 4 |
| 90-100% | 0 | 3 | - | 2 | 1 | 1 | 1 | 2 | 4 | 2 | 0 | 1 | 1 | 1 | - | 3 | 1 | 2 |
| 80-90% | 6 | 3 | 1 | 3 | 2 | 2 | 2 | 1 | 3 | 2 | 2 | 4 | 1 | 3 | 2 | 4 | 2 | 4 |
| 70-80% | 2 | 3 | 1 | 3 | 4 | 3 | 5 | 4 | 2 | 3 | 2 | 3 | 3 | 4 | - | 4 | 2 | 3 |
| 60-70% | 2 | 1 | 3 | - | 2 | 2 | 1 | 1 | 1 | 1 | 3 | - | 3 | 1 | - | 1 | - | 2 |
| 50-60% | 1 | 1 | 2 | 2 | 1 | 2 | 2 | 3 | 1 | 1 | - | 1 | - | 1 | 2 | 1 | 1 | - |
| 40-50% | 2 | 2 | - | 1 | 1 | 1 | 2 | 1 | 2 | 1 | 2 | 1 | 3 | 1 | 1 | 1 | 1 | 2 |
| 30-40% | - | 1 | - | 2 | 1 | 1 | 1 | 1 | 2 | - | 1 | 2 | 1 | - | - | 1 | 1 | - |
| 20-30% | - | 3 | 1 | - | - | - | - | - | - | - | - | 1 | - | 1 | - | - | - | 1 |
| 10-20% | - | - | - | 1 | - | 1 | 1 | 1 | - | 2 | - | 1 | - | 1 | - | 1 | - | - |
